# Supplementary material for: Anti-tumor activities of the new oral pan-RAF inhibitor, TAK-580, used as monotherapy or in combination with novel agents in multiple myeloma
Source: PubMed Central journal article supplement (PMC7646837; doi:10.18632/oncotarget.27775), 2020-11-03
Supplement: oncotarget-11-3984-s001.pdf [file oncotarget-11-3984-s001.pdf]

## Anti-tumor activities of the new oral pan-RAF inhibitor, TAK-580, used as monotherapy or in combination with novel agents in multiple myeloma

### SUPPLEMENTARY MATERIALS

# TAK-580

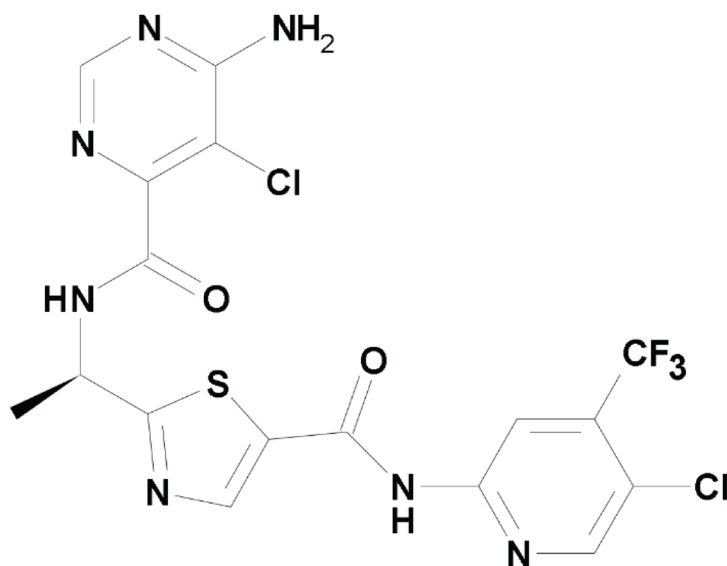

Supplementary Figure 1: Chemical structure of TAK-580.

## KMS-11

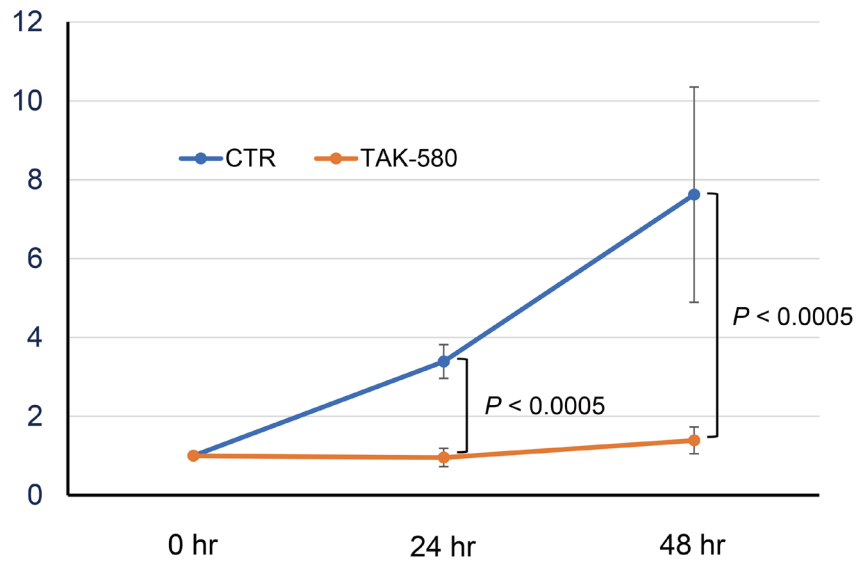

## U266

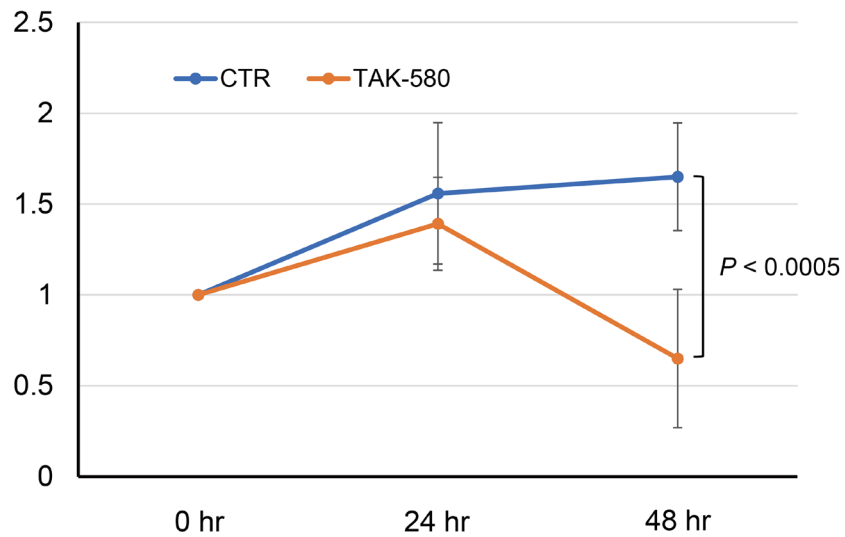

**Supplementary Figure 2: Time-dependent effect of TAK-580 in MM cells.** KMS-11 and U266 cells were cultured with TAK-580 (20  $\mu$ M) for 24 or 48 h. The cell number and viability were assessed with trypan blue exclusion. Data are the mean  $\pm$  SD of six replicate wells.

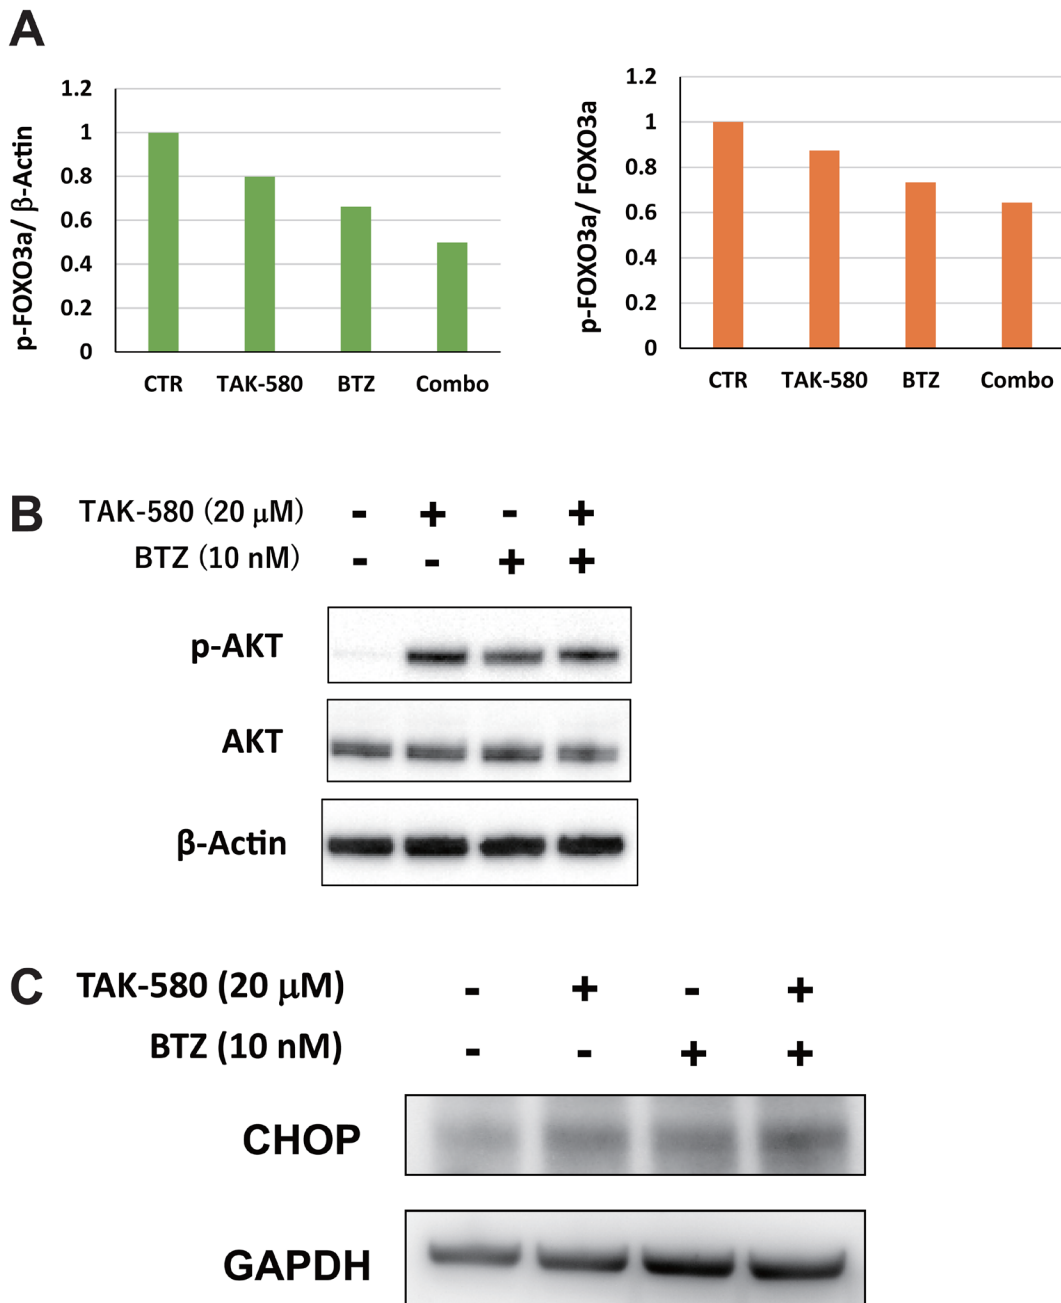

**Supplementary Figure 3: The combination of TAK-580 and BTZ triggers synergistic anti-MM activity.** (A) (Left panel): The graph represents ratios of p-FOXO3 density relative to β-Actin in Figure 4D. (Right panel): The graph represents ratios of p-FOXO3 density relative to FOXO3 in Figure 4D. (B) KMS-11 cells were treated with TAK-580 (20 μM) alone or in combination with BTZ (10 nM) for 16 h. Whole-cell lysates were subjected to western blotting using phospho-AKT, AKT, and β-Actin Abs. (C) RPMI-8226 cells were treated with TAK-580 (20 μM) alone or in combination with BTZ (10 nM) for 5 h. Whole-cell lysates were subjected to western blotting using CHOP and β-Actin Abs.
